# Supplementary material for: Pentanuclear MII–MnII (M = Ni and Cu) complexes of N2O2 donor ligands with a variation of carboxylate anions: syntheses, structures, magnetic properties and catecholase-like activities
Source: Royal Society of Chemistry journal article supplement (doi:10.1039/d2nj02215j), 2022-01-01
Supplement: d2nj02215j1.pdf [file d2nj02215j1.pdf]

## Pentanuclear $M^{II}$ - $Mn^{II}$ ( $M = Ni$ and $Cu$ ) complexes of $N_2O_2$ donor ligands with the variation of carboxylate anions: syntheses, structures, magnetic properties and catecholase-like activities

Sayantana Ganguly,<sup>a,b</sup> Pradip Bhunia,<sup>a</sup> Júlia Mayans,<sup>c</sup> Ashutosh Ghosh<sup>a,d\*</sup>

<sup>a</sup>Department of Chemistry, University College of Science, University of Calcutta, 92, A. P. C. Road, Kolkata-700 009, India; e-mail: ghosh\_59@yahoo.com

<sup>b</sup>Department of Chemistry, Taki Government College, Taki, Hasnabad, West Bengal 743429, India

<sup>c</sup>Departament de Química Inorgànica i Orgànica and Institut de Nanociència i Nanotecnologia (IN<sup>2</sup>UB). Universitat de Barcelona (UB), Martí i Franqués 1-11, Barcelona-08028, Spain.

<sup>d</sup>Rani Rashmoni Green University, Tarakeswar, Hooghly 712410, West Bengal, India

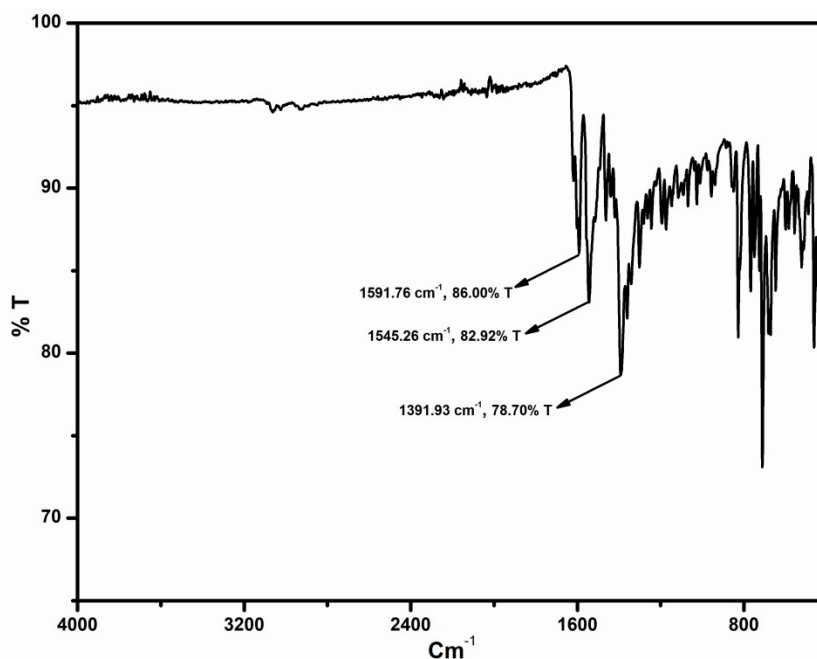

Figure S1. Representative IR spectrum of complex 1.

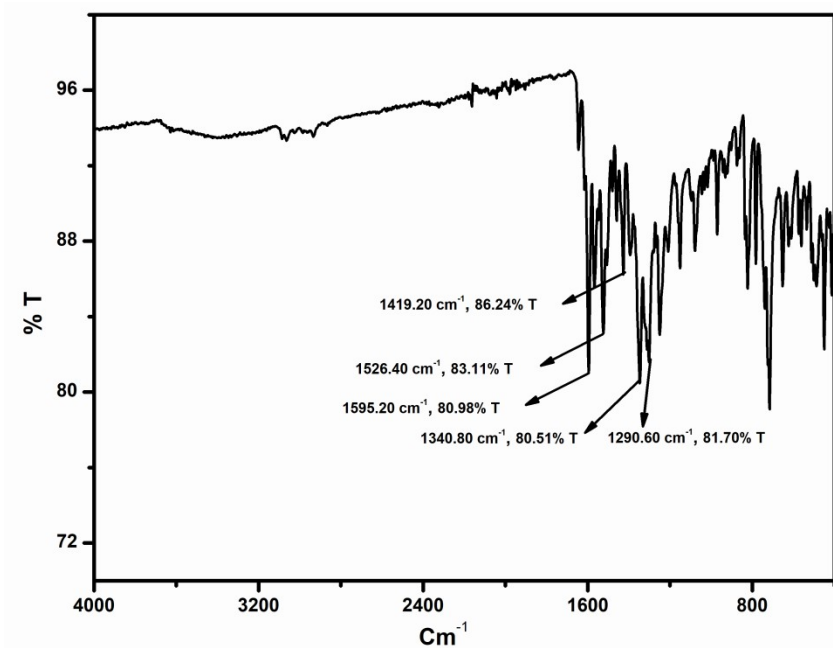

**Figure S2.** Representative IR spectrum of complex 2.

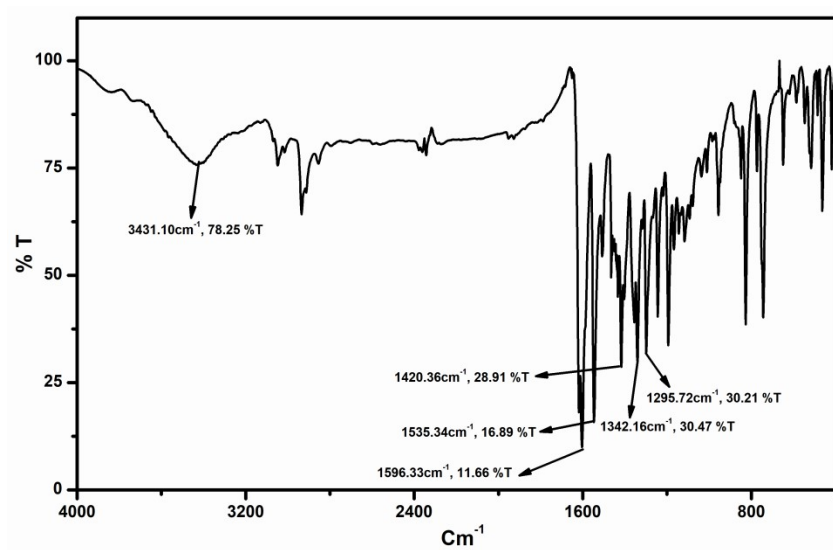

**Figure S3.** Representative IR spectrum of complex 3.

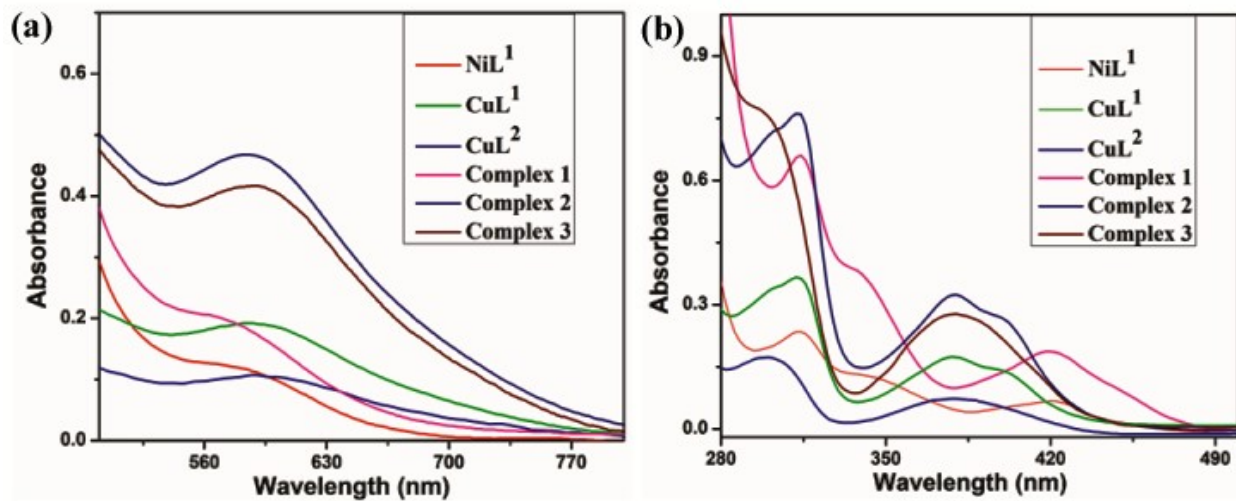

**Figure S4.** Representative UV-Vis spectra of NiL<sup>1</sup>, CuL<sup>1</sup>, CuL<sup>2</sup> and complexes (1–3) in DMF-acetonitrile solution (left) d-d transition and (right) charge transfer band.

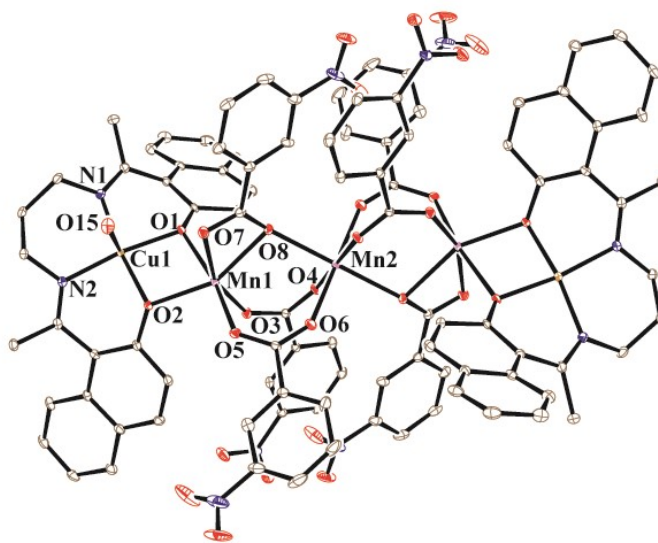

**Figure S5.** The structure of complex 3 with ellipsoid at 30% probability. Hydrogen atoms omitted for clarity.

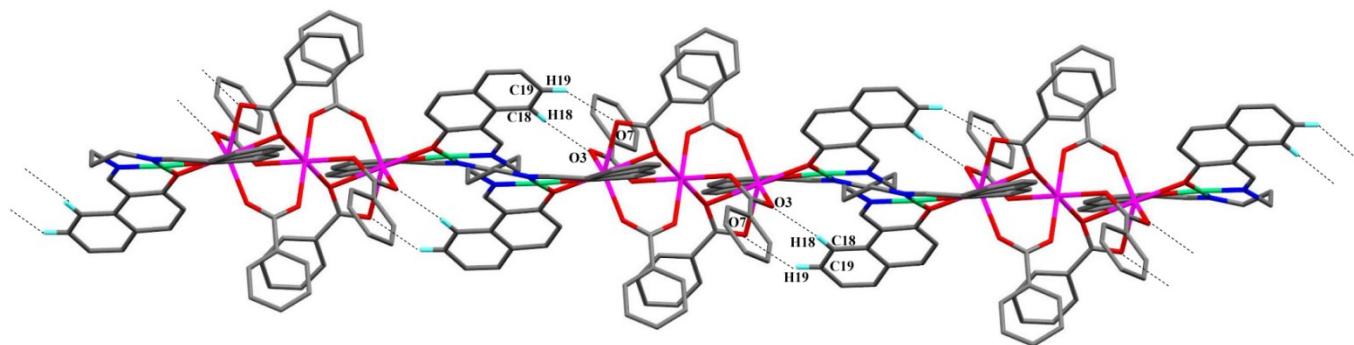

**Figure S6.** The 1D chain of complex **1** formed by intermolecular hydrogen bonding interactions. The other H-atoms are removed for picture clarity.

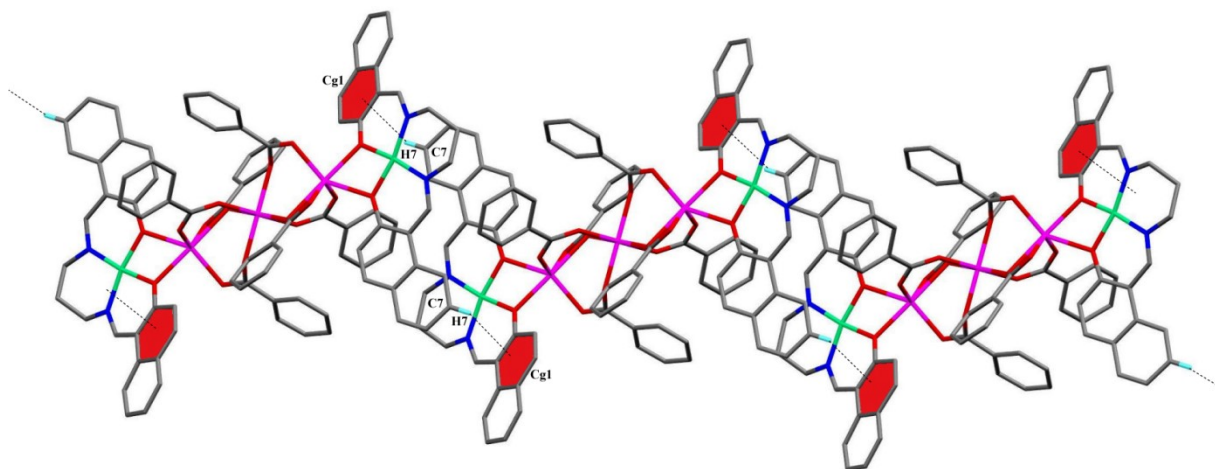

**Figure S7.** Formation of intermolecular C-H $\cdots$  $\pi$  in complex **1**. Other H-atoms are removed for picture clarity.

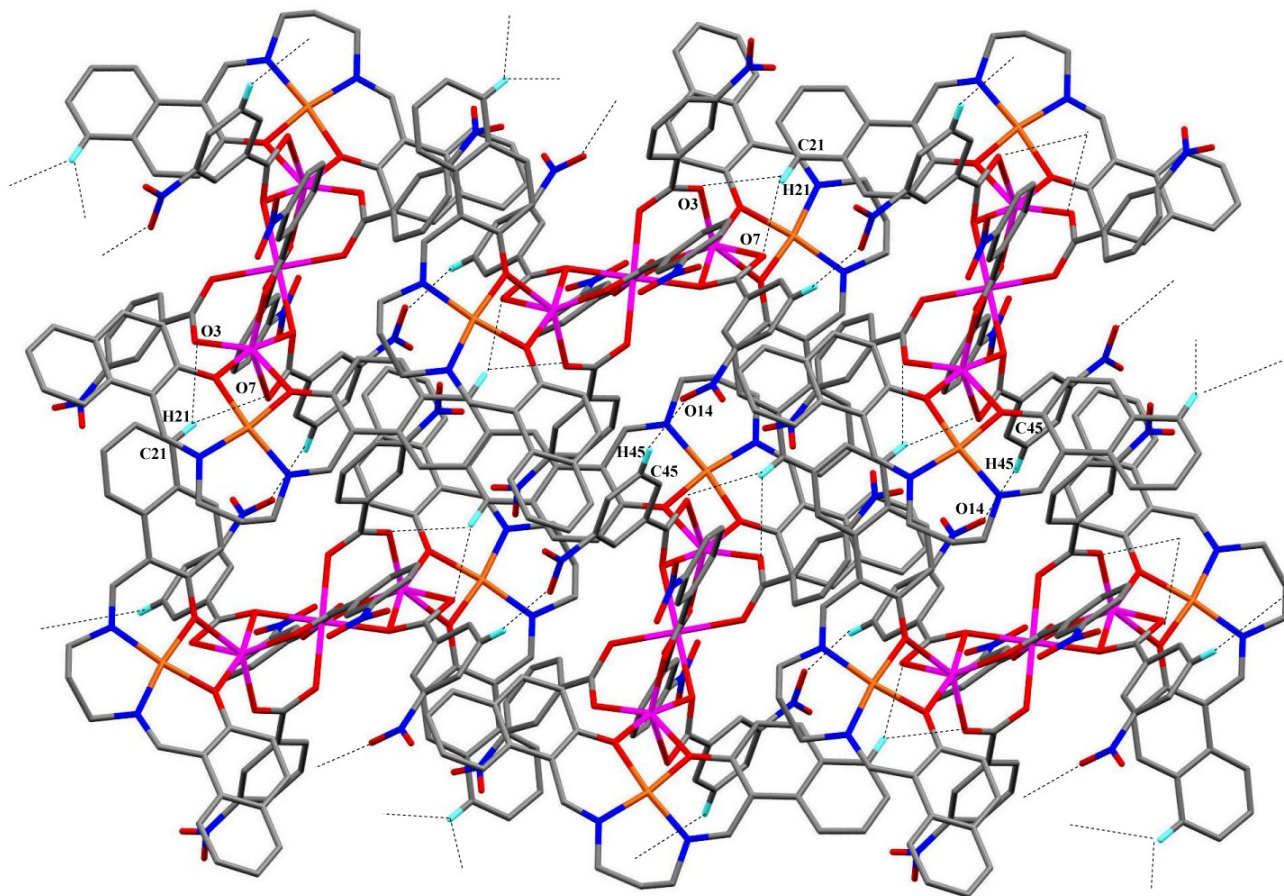

**Figure S8.** The 1D chain of complex **2** formed by intermolecular hydrogen bonding interactions. The other H-atoms are removed for picture clarity.

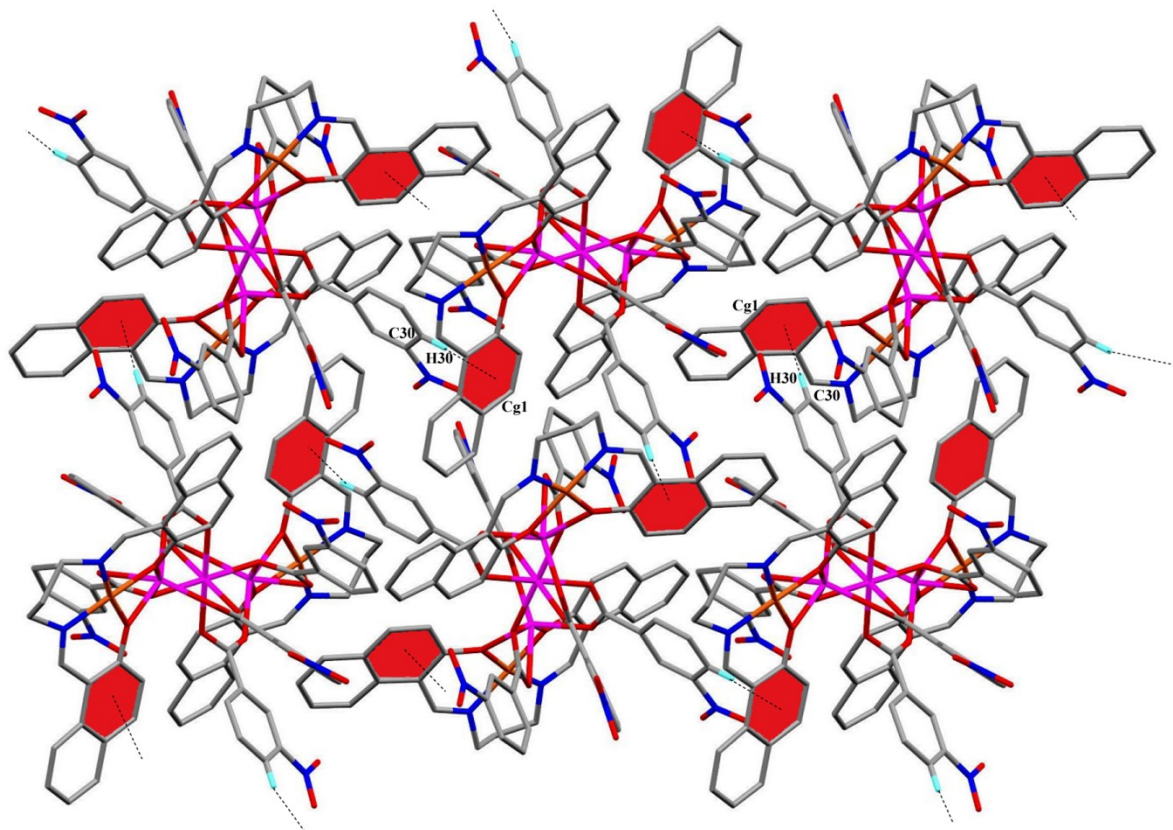

**Figure S9.** Formation of intermolecular C–H····π in complex **2**. Other H-atoms are removed for picture clarity.

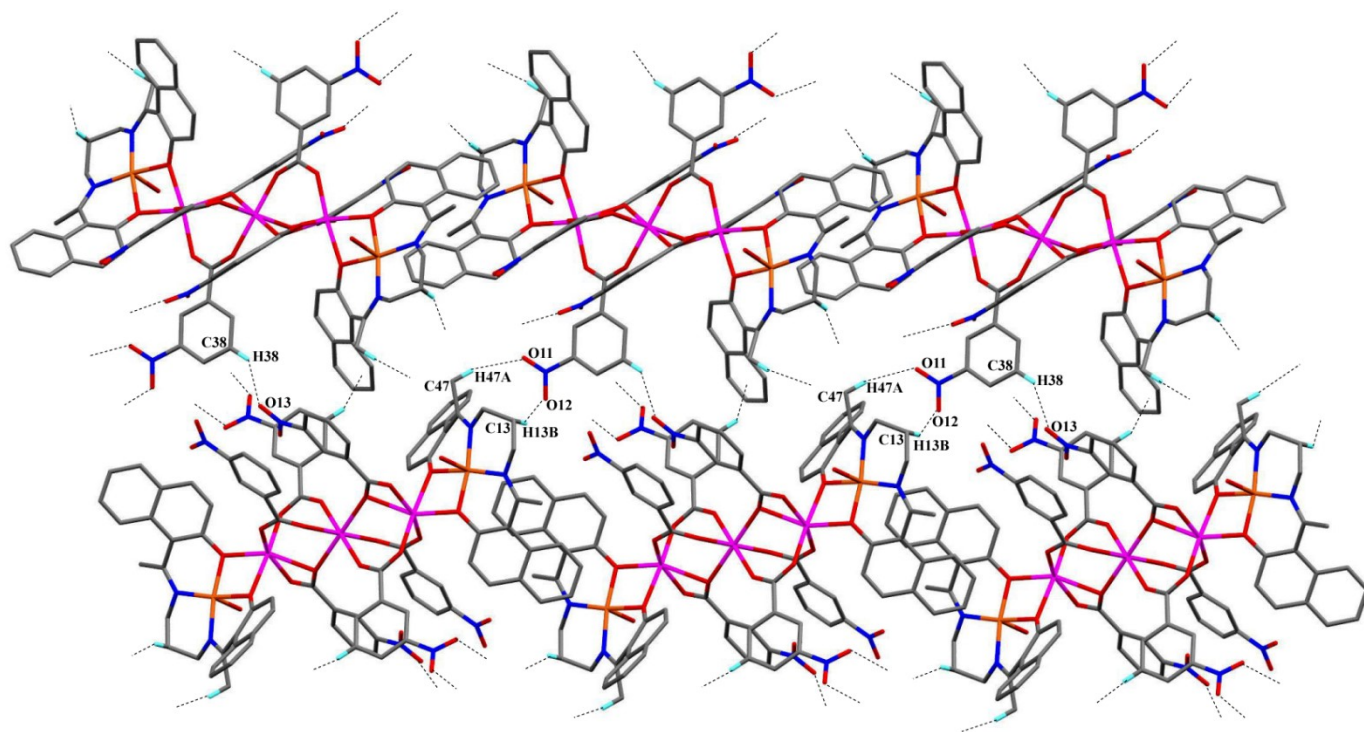

**Figure S10.** The 1D chain of complex **3** formed by intermolecular hydrogen bonding interactions. The other H-atoms are removed for picture clarity.

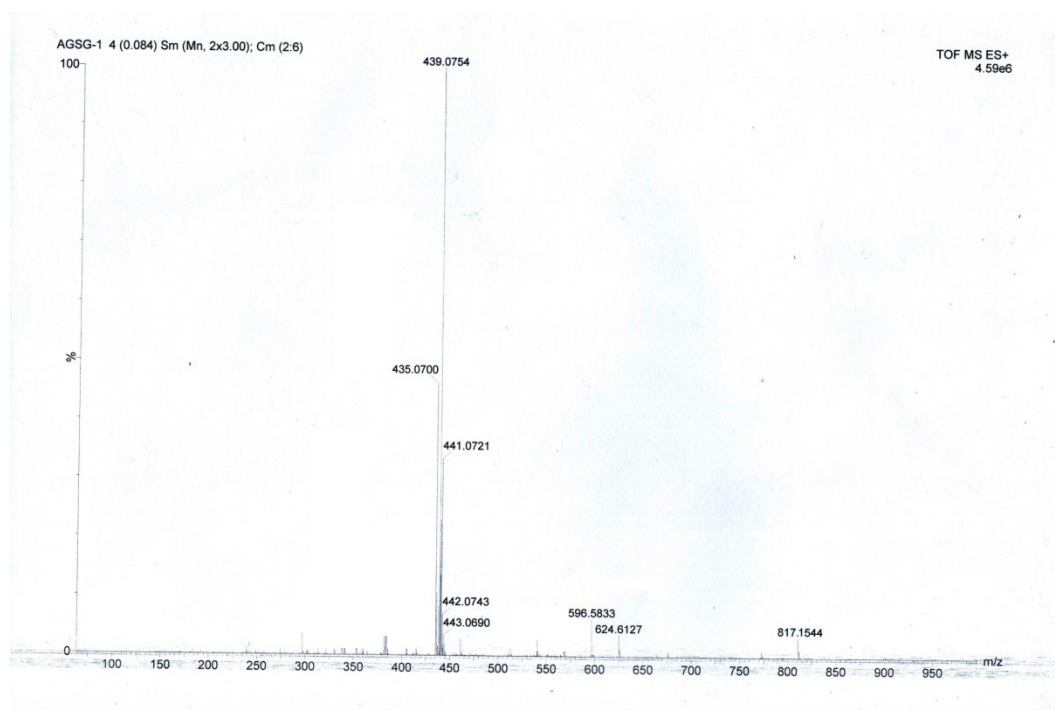

**Figure S11.** Representative ESI mass spectrum of complex **1**.

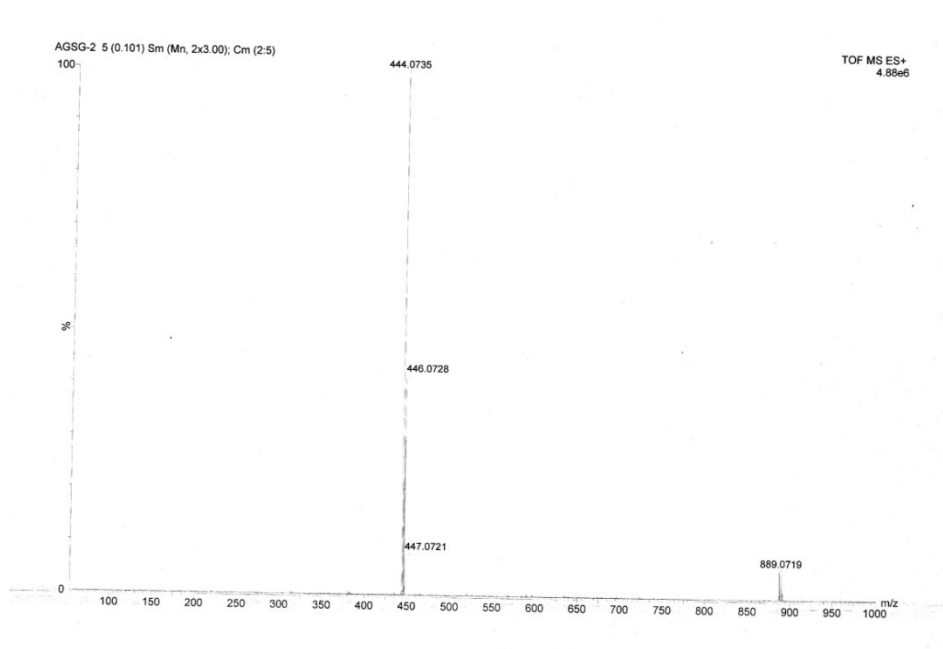

**Figure S12.** Representative ESI mass spectrum of complex **2**.

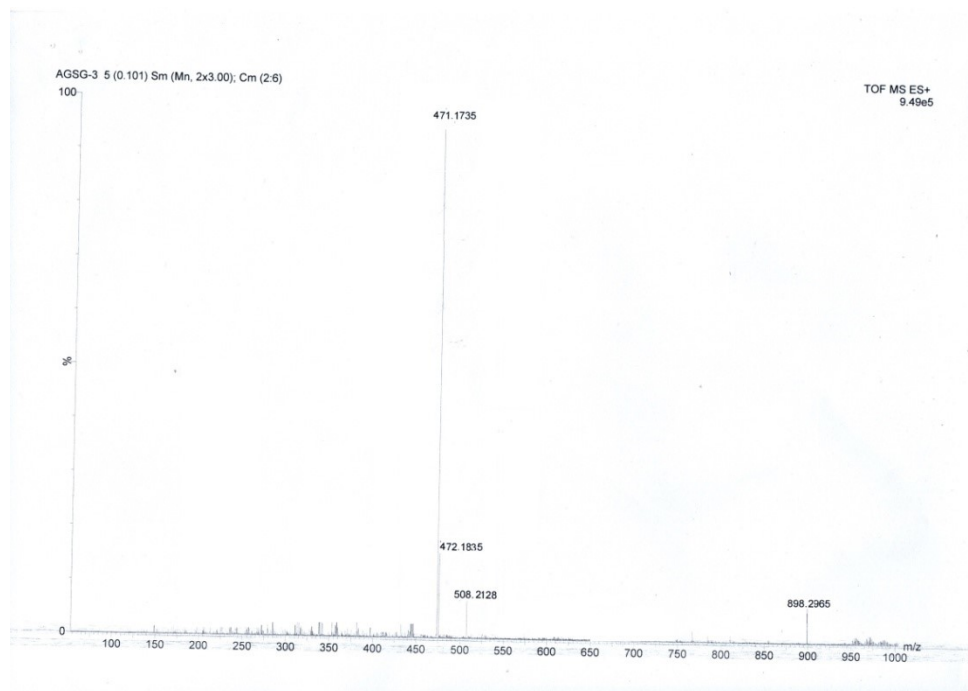

**Figure S13.** Representative ESI mass spectrum of complex **3**.



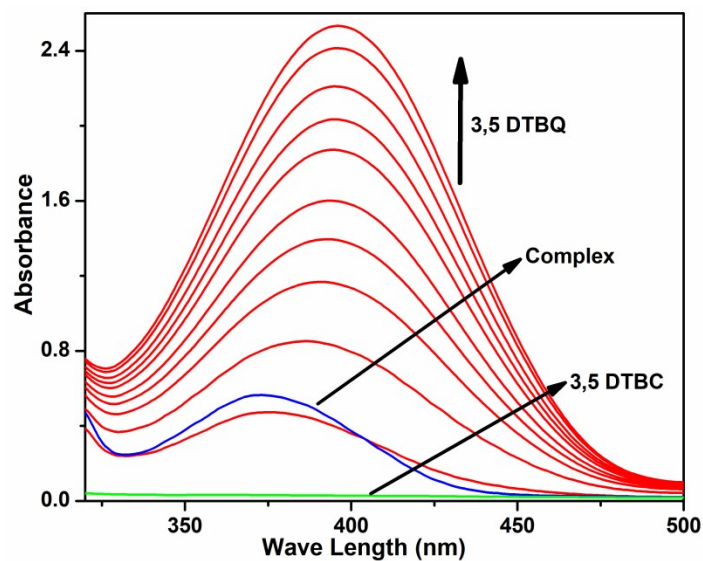

**Figure S14.** Increase in absorbance around 400 nm, after mixing equal volumes of DMF-acetonitrile solutions of 3,5-DTBC ( $1.0 \times 10^{-2}$  M) and **3** ( $1.5 \times 10^{-5}$  M). The spectra were recorded in every 5 min interval.

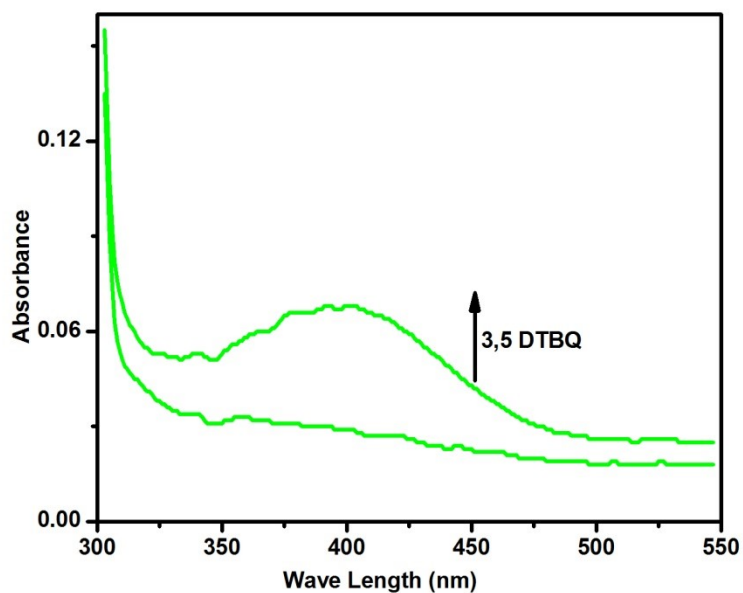

**Figure S15.** Representative UV-vis spectra of 3,5-DTBC (Blank) in DMF-acetonitrile solution.

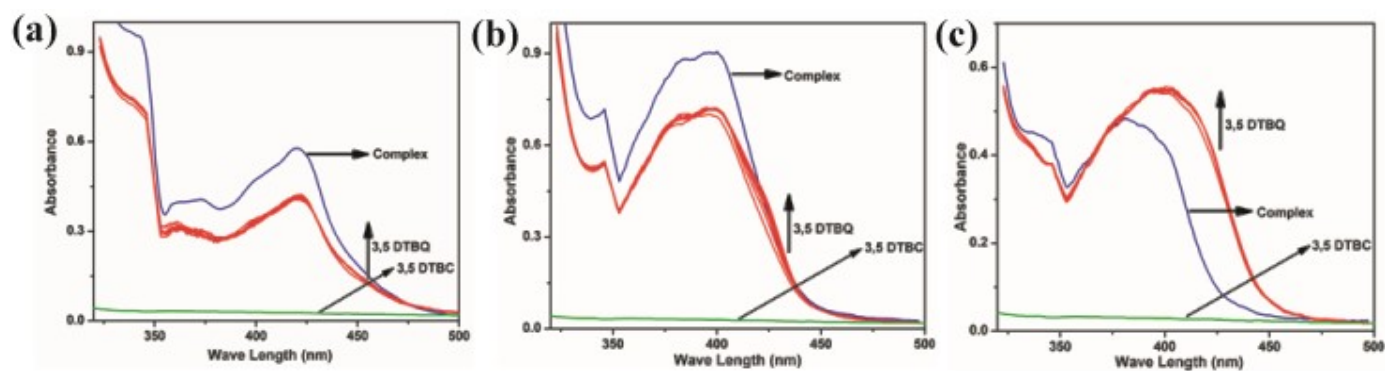

**Figure S16.** Representative UV-vis spectra of the “metalloligand” (a)  $[\text{NiL}^1]$ , (b)  $[\text{CuL}^1]$  and (c)  $[\text{CuL}^2]$  with 3,5-DTBC in DMF-acetonitrile solution. The spectra were recorded in every 3 min interval.

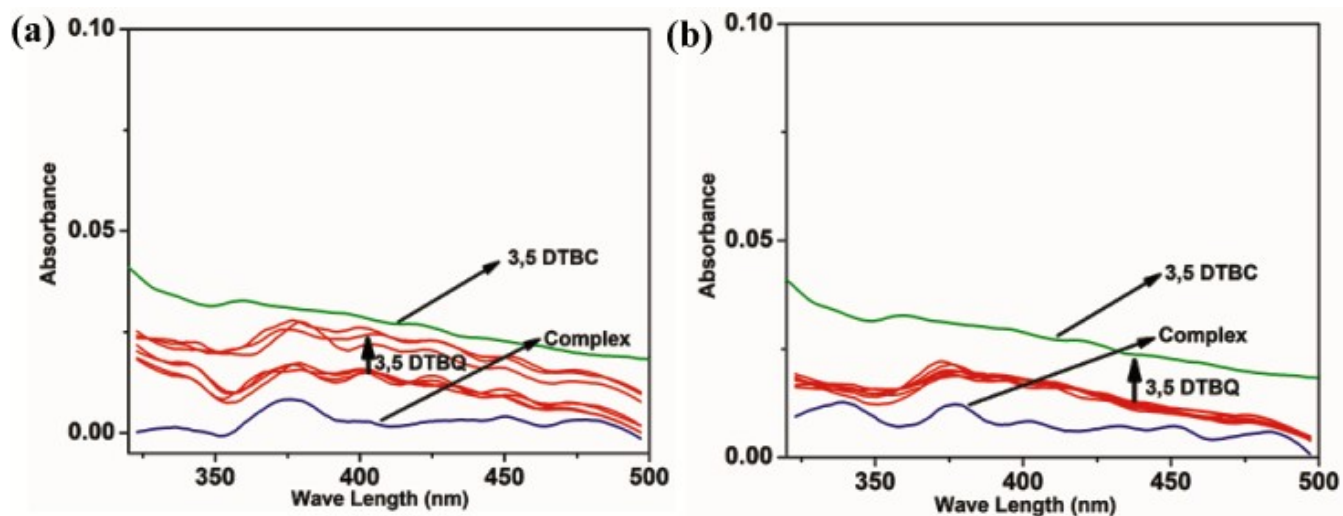

**Figure S17.** Representative UV-vis spectra of (a)  $\text{Mn}(\text{C}_6\text{H}_5\text{CO}_2)_2 \cdot 4\text{H}_2\text{O}$  and (b)  $\text{Mn}(m\text{-(NO}_2\text{)C}_6\text{H}_4\text{CO}_2)_2 \cdot 2\text{H}_2\text{O}$  with 3,5-DTBC in DMF-acetonitrile solution. The spectra were recorded in every 3 min interval.

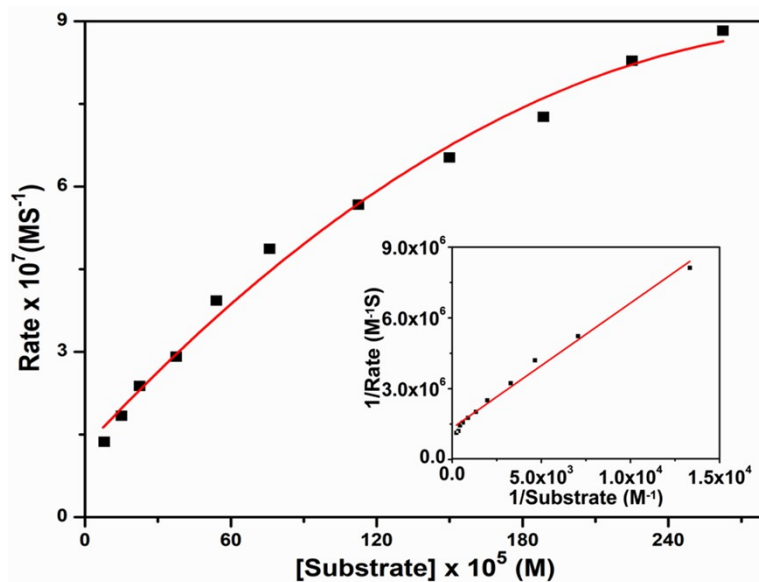

**Figure S18.** Plot of initial rates *vs.* substrate concentration for the oxidation reaction of 3,5-DTBC catalyzed by complex **3**. Inset shows the Lineweaver–Burk plot. Symbols and solid lines represent the experimental and simulated profiles, respectively.

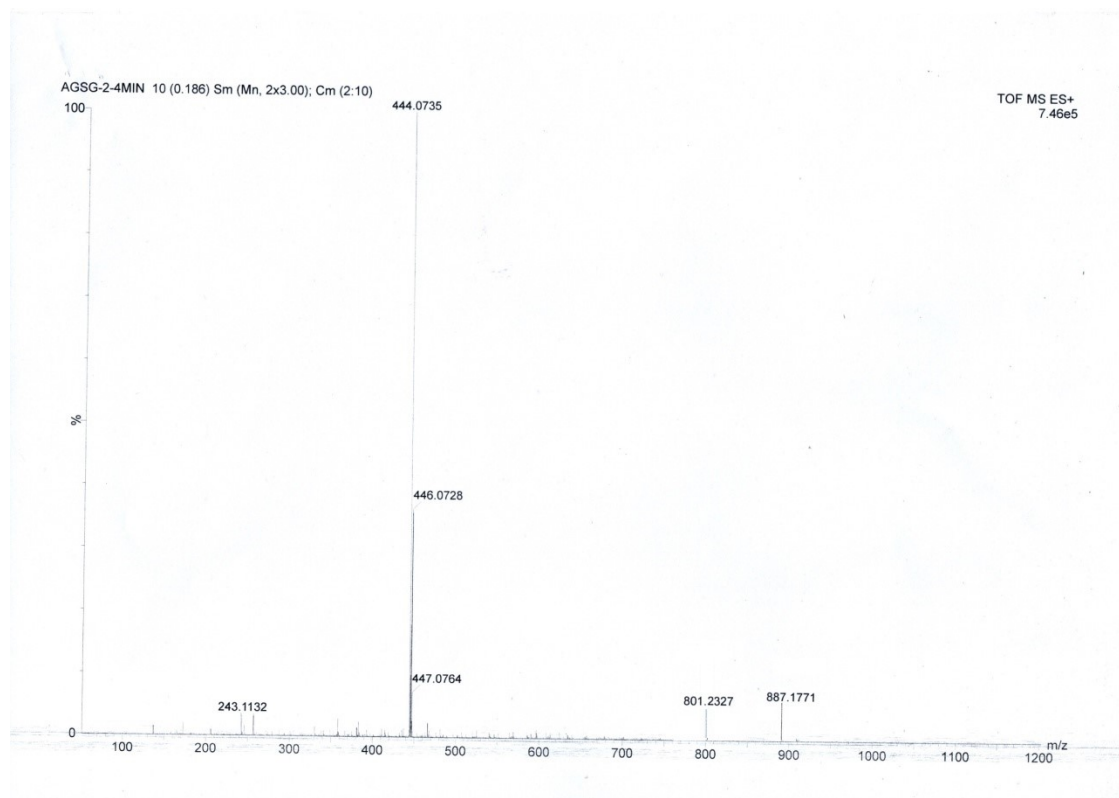

**Figure S19.** Representative ESI mass spectrum of complex **2** with 3,5-DTBC.

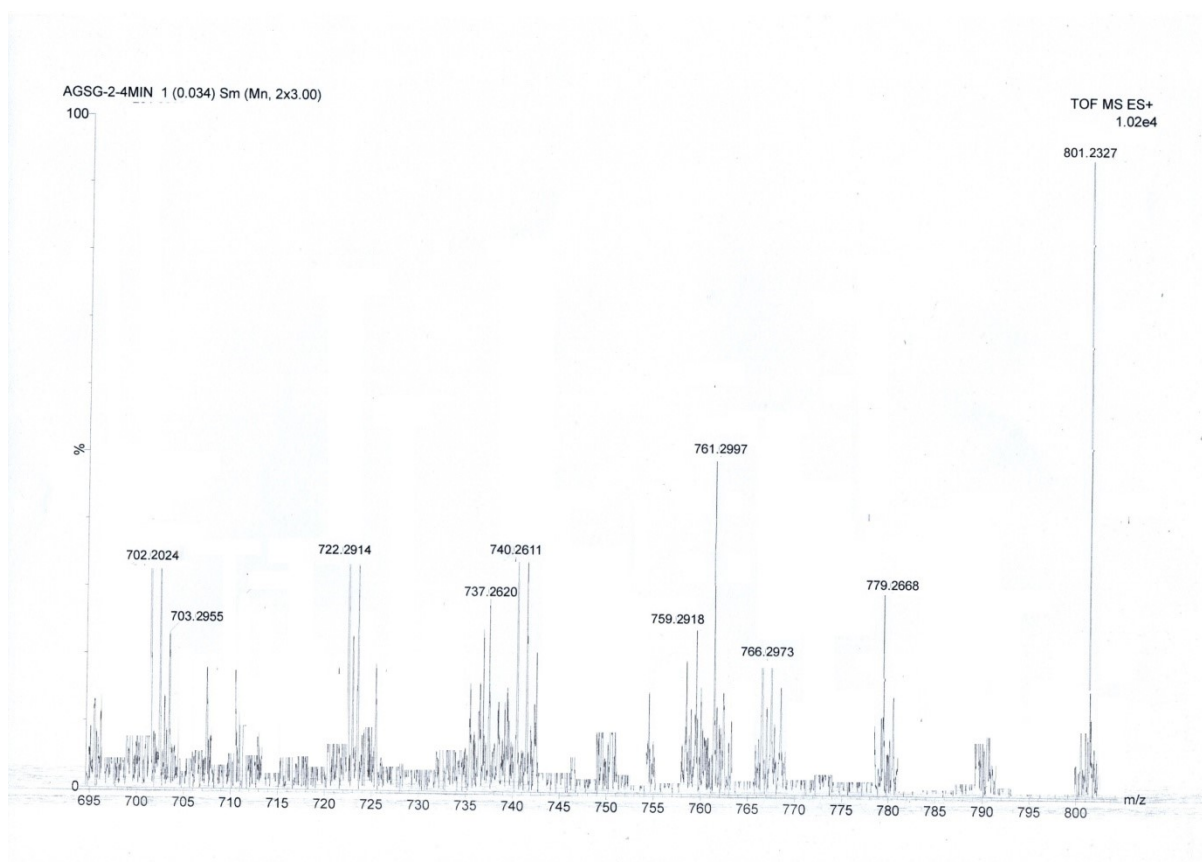

**Figure S20.** Representative ESI mass spectrum of complex **2** with 3,5-DTBC. (Expanded)

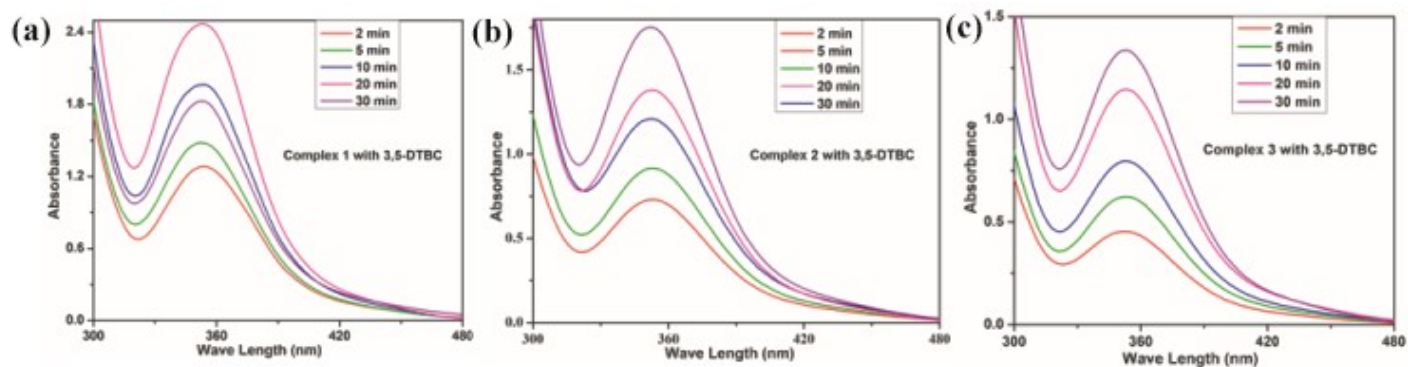

**Figure S21.** Increase of the absorption band at around 353 nm during the estimation of  $\text{H}_2\text{O}_2$  iodometrically for complexes (**1–3**). The spectra were recorded at different time interval for complexes (**1–3**).

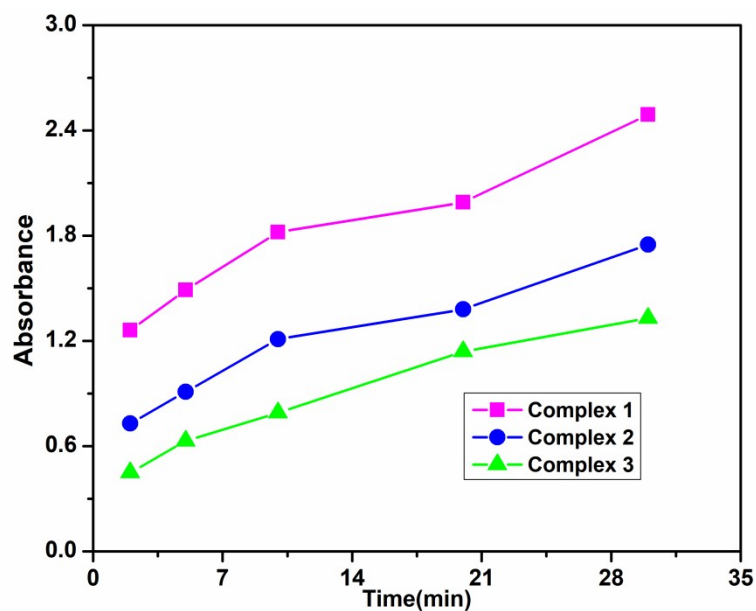

**Figure S22.** Plot of H<sub>2</sub>O<sub>2</sub> estimation of complexes (1–3).

**Table ST1.** Selected bond distances (Å) and angles (°) for complex 1

| <b>1</b>                  |            |           |            |
|---------------------------|------------|-----------|------------|
| <b>Bond distances (Å)</b> |            |           |            |
| Mn1–O1                    | 2.254(5)   | Mn1–O2    | 2.197(5)   |
| Mn1–O3                    | 2.146(5)   | Mn1–O5    | 2.085(5)   |
| Mn1–O7                    | 2.287(5)   | Mn1–O8    | 2.310(5)   |
| Mn2–O4                    | 2.188(4)   | Mn2–O6    | 2.127(4)   |
| Mn2–O8                    | 2.181(5)   | Ni1–O1    | 1.876(5)   |
| Ni1–O2                    | 1.854(5)   | Ni1–N1    | 1.897(5)   |
| Ni1–N2                    | 1.891(5)   |           |            |
| <b>Bond angles(°)</b>     |            |           |            |
| O1–Mn1–O2                 | 65.13(18)  | O1–Mn1–O3 | 139.02(17) |
| O1–Mn1–O4                 | 165.93(15) | O1–Mn1–O5 | 87.28(18)  |
| O1–Mn1–O7                 | 82.59(17)  | O1–Mn1–O8 | 113.16(18) |
| O2–Mn1–O3                 | 86.21(18)  | O2–Mn1–O4 | 112.18(16) |
| O2–Mn1–O5                 | 91.53(19)  | O2–Mn1–O7 | 121.66(17) |

|                                             |            |                        |           |
|---------------------------------------------|------------|------------------------|-----------|
| O2–Mn1–O8                                   | 178.10(18) | O3–Mn1–O4              | 51.26(15) |
| O3–Mn1–O5                                   | 123.90(19) | O3–Mn1–O7              | 89.24(18) |
| O3–Mn1–O8                                   | 94.85(17)  | O4–Mn1–O5              | 78.91(17) |
| O4–Mn1–O7                                   | 109.22(15) | O4–Mn1–O8              | 69.69(15) |
| O5–Mn1–O7                                   | 135.89(19) | O5–Mn1–O8              | 89.19(18) |
| O7–Mn1–O8                                   | 56.83(16)  | O4–Mn2–O6              | 92.33(18) |
| O4–Mn2–O8                                   | 84.76(17)  | O4–Mn2–O6 <sup>a</sup> | 87.67(18) |
| O4–Mn2–O8 <sup>a</sup>                      | 95.24(17)  | O6–Mn2–O8              | 89.67(18) |
| O6–Mn2–O8 <sup>a</sup>                      | 90.33(18)  | O1–Ni1–O2              | 80.00(2)  |
| O1–Ni1–N1                                   | 92.10(2)   | O1–Ni1–N2              | 169.00(2) |
| O2–Ni1–N1                                   | 171.40(2)  | O2–Ni1–N2              | 90.40(2)  |
| N1–Ni1–N2                                   | 97.90(2)   | Ni1–O1–Mn1             | 103.50(2) |
| Ni1–O2–Mn1                                  | 106.40(2)  | Mn1–O4–Mn2             | 90.33(17) |
| Mn1–O8–Mn2                                  | 104.8(2)   |                        |           |
| Symmetry Element <sup>a</sup> = 1-x,1-y,1-z |            |                        |           |

**Table ST2.** Selected bond distances (Å) and angles (°) for complexes **2** & **3**

|                           | <b>2</b> | <b>3</b> |
|---------------------------|----------|----------|
| <b>Bond distances (Å)</b> |          |          |
| Mn1–O1                    | 2.188(3) | 2.201(2) |
| Mn1–O2                    | 2.197(3) | 2.151(2) |
| Mn1–O3                    | 2.110(3) | 2.086(2) |
| Mn1–O5                    | 2.097(3) | 2.127(3) |
| Mn1–O7                    | 2.351(3) | 2.237(2) |
| Mn1–O8                    | 2.251(3) | 2.311(2) |
| Mn2–O4                    | 2.134(3) | 2.167(2) |
| Mn2–O6                    | 2.151(3) | 2.136(3) |
| Mn2–O8                    | 2.206(3) | 2.278(2) |

|                        |            |            |
|------------------------|------------|------------|
| Cu1–O1                 | 1.918(3)   | 1.959(2)   |
| Cu1–O2                 | 1.936(4)   | 1.953(2)   |
| Cu1–N1                 | 1.955(5)   | 1.978(3)   |
| Cu1–N2                 | 1.952(3)   | 1.974(3)   |
| Cu1–O15                |            | 2.569(3)   |
| <b>Bond angles(°)</b>  |            |            |
| O1–Mn1–O2              | 68.09(13)  | 73.24(8)   |
| O1–Mn1–O3              | 90.42(13)  | 97.59(9)   |
| O1–Mn1–O5              | 93.65(13)  | 167.79(10) |
| O1–Mn1–O7              | 111.61(13) | 82.89(9)   |
| O1–Mn1–O8              | 167.57(13) | 89.01(8)   |
| O2–Mn1–O3              | 146.43(14) | 98.79(9)   |
| O2–Mn1–O5              | 95.86(12)  | 97.86(9)   |
| O2–Mn1–O7              | 81.53(11)  | 101.77(9)  |
| O2–Mn1–O8              | 103.33(13) | 155.29(9)  |
| O3–Mn1–O5              | 111.56(14) | 91.95(10)  |
| O3–Mn1–O7              | 83.16(14)  | 158.62(10) |
| O3–Mn1–O8              | 92.90(13)  | 100.54(9)  |
| O5–Mn1–O7              | 151.05(14) | 91.00(9)   |
| O5–Mn1–O8              | 96.25(13)  | 96.73(9)   |
| O7–Mn1–O8              | 57.03(12)  | 58.08(9)   |
| O4–Mn2–O6              | 94.94(12)  | 88.79(9)   |
| O4–Mn2–O8              | 89.90(12)  | 91.31(8)   |
| O4–Mn2–O6 <sup>a</sup> | 85.06(12)  | 91.21(9)   |
| O4–Mn2–O8 <sup>a</sup> | 90.10(12)  | 88.69(8)   |
| O6–Mn2–O8              | 89.48(11)  | 90.60(9)   |
| O6–Mn2–O8 <sup>a</sup> | 90.53(12)  | 89.40(9)   |
| O1–Cu1–O2              | 79.12(14)  | 83.16(10)  |
| O1–Cu1–N1              | 92.19(18)  | 89.05(10)  |
| O1–Cu1–N2              | 167.90(2)  | 172.36(11) |

|                                                                                                                     |            |            |
|---------------------------------------------------------------------------------------------------------------------|------------|------------|
| O2–Cu1–N1                                                                                                           | 171.30(18) | 171.31(10) |
| O2–Cu1–N2                                                                                                           | 90.56(18)  | 89.78(11)  |
| N1–Cu1–N2                                                                                                           | 98.10(2)   | 98.18(12)  |
| O1–Cu1–O15                                                                                                          |            | 93.75(9)   |
| O2–Cu1–O15                                                                                                          |            | 86.92(10)  |
| O15–Cu1–N1                                                                                                          |            | 89.77(10)  |
| O15–Cu1–N2                                                                                                          |            | 88.79(10)  |
| Cu1–O1–Mn1                                                                                                          | 102.41(15) | 99.62(10)  |
| Cu1–O2–Mn1                                                                                                          | 101.46(14) | 101.50(10) |
| Mn1–O8–Mn2                                                                                                          | 107.35(14) | 106.62(9)  |
| Symmetry elements: <sup>a</sup> = 1-x,1-y,1-z for complex <b>2</b> ; <sup>a</sup> = -x,1-y,1-z for complex <b>3</b> |            |            |

**Table ST3.** Representation of the d-d band and CT band in the complexes (**1–3**)

| Complex             | d-d band<br>( $\lambda_{\max}$ (nm) ( $\epsilon, M^{-1}cm^{-1}$ ) in DMF) | CT band<br>( $\lambda_{\max}$ (nm) ( $\epsilon, M^{-1}cm^{-1}$ ) in DMF) |
|---------------------|---------------------------------------------------------------------------|--------------------------------------------------------------------------|
| [NiL <sup>1</sup> ] | 581(114)                                                                  | 422 (6806), 314(23249)                                                   |
| [CuL <sup>1</sup> ] | 593(193)                                                                  | 378 (17285), 312(36459)                                                  |
| [CuL <sup>2</sup> ] | 595(106)                                                                  | 381 (7252), 300 (17118)                                                  |
| <b>1</b>            | 572(200)                                                                  | 419(18901), 315(65832)                                                   |
| <b>2</b>            | 588(468)                                                                  | 379(32445), 312(75865)                                                   |
| <b>3</b>            | 591(416)                                                                  | 378(30104), 298(76980)                                                   |

**Table ST4.** Bond valence sum (BVS)<sup>a</sup> calculations for complex **1**.

| Atom | Mn <sup>II</sup> | Mn <sup>III</sup> |
|------|------------------|-------------------|
| Mn1  | <u>1.81</u>      | 1.67              |
| Mn2  | <u>2.04</u>      | 1.86              |

**Table ST5.** Bond valence sum (BVS)<sup>a</sup> calculations for complex **2**.

| Atom | Mn <sup>II</sup> | Mn <sup>III</sup> |
|------|------------------|-------------------|
| Mn1  | <u>1.91</u>      | 1.75              |
| Mn2  | <u>2.04</u>      | 1.88              |



**Table ST6.** Bond valence sum (BVS)<sup>a</sup> calculations for complex **3**.

| Atom | Mn <sup>II</sup> | Mn <sup>III</sup> |
|------|------------------|-------------------|
| Mn1  | <u>1.97</u>      | 1.79              |
| Mn2  | <u>1.92</u>      | 1.74              |

<sup>a</sup>The underlined value is the one closest to the charge for which it was calculated. The oxidation state is the nearest whole number to the underlined value.

**Table ST7.** Geometric features (Distances in (Å) and Angles in (°)) of the H-bond interactions obtained for complex **1**

| Donor-H····Acceptor | D-H ( Å ) | H····A ( Å ) | D····A ( Å ) | ∠D-H····A (°) | Symmetry Element |
|---------------------|-----------|--------------|--------------|---------------|------------------|
| C18-H18 ···O3       | 0.95      | 2.51         | 3.439(7)     | 168           | 1-x, 1-y, 2-z    |
| C19-H19 ···O7       | 0.95      | 2.52         | 3.355(7)     | 146           | 1-x, 1-y, 2-z    |

**Table ST8.** Geometric features (Distances in (Å) and Angles in (°)) of the C-H /π interactions obtained for complex **1**

| C-H····Cg(Ring) | H····Cg ( Å ) | ∠C-H····Cg (°) | C····Cg ( Å ) | Symmetry Element |
|-----------------|---------------|----------------|---------------|------------------|
| C7-H7····Cg1    | 2.97          | 133            | 3.691(8)      | 2-x,2-y,2-z      |

**Table ST9** Geometric features (Distances in (Å) and Angles in (°)) of the H-bond interactions obtained for complex **2**

| Donor-H····Acceptor | D-H ( Å ) | H····A ( Å ) | D····A ( Å ) | ∠D-H····A (°) | Symmetry Element |
|---------------------|-----------|--------------|--------------|---------------|------------------|
| C21-H21 ···O3       | 0.95      | 2.58         | 3.262(7)     | 129           | x, 1/2-y, -1/2+z |

|              |      |      |          |     |                  |
|--------------|------|------|----------|-----|------------------|
| C21–H21 ⋯O7  | 0.95 | 2.56 | 3.470(7) | 160 | x, 1/2-y, -1/2+z |
| C45–H45 ⋯O14 | 0.95 | 2.38 | 3.310(7) | 168 | x, 1/2-y, 1/2+z  |

**Table ST10.** Geometric features (Distances in (Å) and Angles in (°)) of the C-H / $\pi$  interactions obtained for complex **2**

| C–H⋯Cg(Ring) | H⋯Cg (Å) | $\angle$ C–H⋯Cg (°) | C⋯Cg (Å) | Symmetry Element  |
|--------------|----------|---------------------|----------|-------------------|
| C30–H30⋯Cg1  | 2.50     | 156                 | 3.397(7) | 1-x, 1/2+y, 3/2-z |

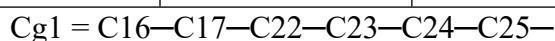

**Table ST11.** Geometric features (Distances in (Å) and Angles in (°)) of the H-bond interactions obtained for complex **3**

| Donor–H⋯Acceptor | D–H (Å) | H⋯A (Å) | D⋯A (Å)  | $\angle$ D–H⋯A (°) | Symmetry Element  |
|------------------|---------|---------|----------|--------------------|-------------------|
| C13–H13B ⋯O12    | 0.99    | 2.57    | 3.438(8) | 147                | 1-x, 1/2+y, 3/2-z |
| C38–H38 ⋯O13     | 0.95    | 2.26    | 3.050(6) | 140                | -x, -1/2+y, 1/2-z |
| C47–H47A ⋯O11    | 0.98    | 2.45    | 3.405(7) | 165                | 1-x, 1/2+y, 3/2-z |

**Table ST12.** Different concentrations of substrate (3,5-DTBC) in DMF/Acetonitrile for kinetic measurement

| Metal complex and its concentration (M) | Concentration of 3,5-DTBC (M)                                                                                                                                                                                                                                        |
|-----------------------------------------|----------------------------------------------------------------------------------------------------------------------------------------------------------------------------------------------------------------------------------------------------------------------|
| <b>1</b> ( $5.0 \times 10^{-6}$ )       | $5.0 \times 10^{-5}$ , $1.0 \times 10^{-4}$ , $1.5 \times 10^{-4}$ , $2.5 \times 10^{-4}$ , $3.5 \times 10^{-4}$ , $5.0 \times 10^{-4}$ , $7.5 \times 10^{-4}$ , $1.0 \times 10^{-3}$ , $1.5 \times 10^{-3}$ , $1.75 \times 10^{-3}$                                 |
| <b>2</b> ( $7.5 \times 10^{-6}$ )       | $7.5 \times 10^{-5}$ , $1.5 \times 10^{-4}$ , $2.25 \times 10^{-4}$ , $3.75 \times 10^{-4}$ , $5.25 \times 10^{-4}$ , $7.5 \times 10^{-4}$ , $1.125 \times 10^{-3}$ , $1.5 \times 10^{-3}$ , $1.875 \times 10^{-3}$ , $2.25 \times 10^{-3}$ , $2.625 \times 10^{-3}$ |
| <b>3</b> ( $7.5 \times 10^{-6}$ )       | $7.5 \times 10^{-5}$ , $1.5 \times 10^{-4}$ , $2.25 \times 10^{-4}$ , $3.75 \times 10^{-4}$ , $5.25 \times 10^{-4}$ , $7.5 \times 10^{-4}$ , $1.125 \times 10^{-3}$ , $1.5 \times 10^{-3}$ , $1.875 \times 10^{-3}$ , $2.25 \times 10^{-3}$ , $2.625 \times 10^{-3}$ |

**Table ST13.** Kinetic parameters for catalytic activities of complexes (1–3) on 3,5-DTBC

| Complex  | $V_{\max}$ (M S <sup>-1</sup> ) | Std. Error              | $K_M$ (M)               | Std. Error              | $k_{\text{cat}}$ (h <sup>-1</sup> ) |
|----------|---------------------------------|-------------------------|-------------------------|-------------------------|-------------------------------------|
| <b>1</b> | 1.02 x 10 <sup>-6</sup>         | 2.22 x 10 <sup>-7</sup> | 4.01 x 10 <sup>-4</sup> | 3.00 x 10 <sup>-5</sup> | 734.0                               |
| <b>2</b> | 9.43 x 10 <sup>-7</sup>         | 4.25 x 10 <sup>-8</sup> | 4.14 x 10 <sup>-4</sup> | 1.52 x 10 <sup>-5</sup> | 450.0                               |
| <b>3</b> | 7.46 x 10 <sup>-7</sup>         | 9.23 x 10 <sup>-8</sup> | 3.98 x 10 <sup>-4</sup> | 2.56 x 10 <sup>-5</sup> | 358.0                               |

**Table ST14.** Kinetic parameters for the oxidation of 3,5-DTBC to 3,5-DTBQ catalyzed by different Cu<sup>II</sup>, Ni<sup>II</sup>, Mn<sup>II</sup>, Ni<sup>II</sup>–Mn<sup>II</sup> and Cu<sup>II</sup>–Mn<sup>II</sup> complexes.<sup>a</sup>

|                                      | Complexes                                                                                                                                                                                 | $k_{\text{cat}}$ (h <sup>-1</sup> )<br>in<br>CH <sub>3</sub> OH | $k_{\text{cat}}$ (h <sup>-1</sup> )<br>in<br>CH <sub>3</sub> CN | $k_{\text{cat}}$ (h <sup>-1</sup> )<br>in<br>DMF | References |
|--------------------------------------|-------------------------------------------------------------------------------------------------------------------------------------------------------------------------------------------|-----------------------------------------------------------------|-----------------------------------------------------------------|--------------------------------------------------|------------|
| <b>Cu<sup>II</sup><br/>complexes</b> | [Cu <sup>II</sup> <sub>2</sub> (L <sup>1</sup> ) <sub>2</sub> (NCO) <sub>2</sub> ]                                                                                                        | 64.2                                                            | Not<br>performed                                                | Not<br>performed                                 | 26a        |
|                                      | [Cu <sup>II</sup> <sub>2</sub> (L <sup>2</sup> ) <sub>2</sub> (NCO) <sub>2</sub> ]·2CH <sub>3</sub> OH                                                                                    | 98.4                                                            | Not<br>performed                                                | Not<br>performed                                 | 26a        |
|                                      | [Cu <sup>II</sup> L <sup>3</sup> (NCO)]                                                                                                                                                   | 23.6                                                            | Not<br>performed                                                | Not<br>performed                                 | 26b        |
|                                      | [Cu <sup>II</sup> (L <sup>4</sup> )bpy]ClO <sub>4</sub>                                                                                                                                   | 83.5                                                            | Not<br>performed                                                | Not<br>performed                                 | 26c        |
|                                      | [Cu <sup>II</sup> (L <sup>4</sup> )phen]ClO <sub>4</sub>                                                                                                                                  | 73.5                                                            | Not<br>performed                                                | Not<br>performed                                 | 26c        |
|                                      | [Cu <sup>II</sup> <sub>2</sub> L <sup>5</sup> <sub>4</sub> (μ-cl)](ClO <sub>4</sub> ) <sub>2</sub>                                                                                        | 183.6                                                           | Not<br>performed                                                | Not<br>performed                                 | 26d        |
|                                      | [Cu <sup>II</sup> <sub>4</sub> (μ <sub>3</sub> -OH) <sub>2</sub> (μ <sub>2</sub> -OH) <sub>2</sub> L <sup>5</sup> <sub>4</sub> (μ-<br>ClO <sub>4</sub> )](ClO <sub>4</sub> ) <sub>2</sub> | 172.8                                                           | Not<br>performed                                                | Not<br>performed                                 | 26d        |
|                                      | [Cu <sup>II</sup> <sub>2</sub> (L <sup>6</sup> H) <sub>2</sub> (H <sub>2</sub> O) <sub>2</sub> (NO <sub>3</sub> ) <sub>2</sub> ] (NO <sub>3</sub> ) <sub>2</sub>                          | 29600.0                                                         | Not<br>performed                                                | Not<br>performed                                 | 26e        |
|                                      | [Cu <sup>II</sup> <sub>2</sub> L <sup>7</sup> (OH)(H <sub>2</sub> O)(NO <sub>3</sub> )] (NO <sub>3</sub> )                                                                                | 3310.0                                                          | Not<br>performed                                                | Not<br>performed                                 | 26e        |

|                                                                                                                                                          |               |               |               |     |
|----------------------------------------------------------------------------------------------------------------------------------------------------------|---------------|---------------|---------------|-----|
| $[\text{Cu}^{\text{II}}_2\text{L}^8(\text{H}_2\text{O})(\text{NO}_3)] (\text{NO}_3)$                                                                     | 7200.0        | Not performed | Not performed | 26e |
| $[\text{Cu}^{\text{II}}_2\text{L}^9(\text{H}_2\text{O})_2(\text{NO}_3)] (\text{NO}_3)_2$                                                                 | 2350.0        | Not performed | Not performed | 26e |
| $[\text{Cu}^{\text{II}}_2\text{L}^{10}(\text{N}_3)_2(\text{H}_2\text{O})_2]$                                                                             | 18000.0       | 21600.0       | Not performed | 26f |
| $[\text{Cu}^{\text{II}}_2\text{L}^{11}(\text{N}_3)_2(\text{H}_2\text{O})_2]$                                                                             | Not performed | 10800.0       | Not performed | 26f |
| $[\text{Cu}^{\text{II}}_2\text{L}^{12}(\text{N}_3)_2(\text{H}_2\text{O})_2]$                                                                             | Not performed | 18000.0       | Not performed | 26f |
| $[\text{Cu}^{\text{II}}_2\text{L}^{13}(\text{N}_3)_2(\text{H}_2\text{O})_2]$                                                                             | 21600.0       | 72000.0       | Not performed | 26f |
| $[\text{Cu}^{\text{II}}_2(\text{HL}^{14})(\text{O}_2\text{CPh})(\text{H}_2\text{O})]-\text{PhCO}_2\cdot\text{H}_2\text{O}$                               | 25.8          | Not performed | Not performed | 26g |
| $[\text{Cu}^{\text{II}}_2\text{L}^{15}]$                                                                                                                 | 720.0         | Not performed | Not performed | 26h |
| $[\text{Cu}^{\text{II}}_2\text{L}^{16}(\text{H}_2\text{O})_4](\text{ClO}_4)_4\cdot 2\text{H}_2\text{O}$                                                  | 63.0          | Not performed | Not performed | 30a |
| $[\text{Cu}^{\text{II}}_2(\text{H}_2\text{L}^{17})(\text{ClO}_4)](\text{ClO}_4)$                                                                         | 58.6          | Not performed | Not performed | 30a |
| $[\text{Cu}^{\text{II}}\text{L}^{18}_2] \cdot 4\text{H}_2\text{O}$                                                                                       | 2796.0        | Not performed | Not performed | 26i |
| $[\text{Cu}^{\text{II}}\text{L}^{19}]$                                                                                                                   | 722.0         | Not performed | Not performed | 26j |
| $[\text{Cu}^{\text{II}}_4(\text{L}^{20}\text{H})_2\text{L}^{20}_2(\text{H}_2\text{O})_2] (\text{ClO}_4)_2\cdot 3\text{H}_2\text{O}$                      | 113.0         | Not performed | Not performed | 26k |
| $[\text{Cu}^{\text{II}}_4(\text{L}^{20}\text{H})_2\text{L}^{20}_2(\text{H}_2\text{O})_2] (\text{ClO}_4)\cdot (\text{tp})_{0.5}\cdot 3\text{H}_2\text{O}$ | 97.0          | Not performed | Not performed | 26k |
| $[(\text{Cu}^{\text{II}}\text{L}^{21})_2(\mu_{1,1}-\text{N}_3)_2\text{Cu}(\text{H}_2\text{O})] \cdot \text{CH}_3\text{OH}$                               | 125.8         | Not performed | Not performed | 26l |

|                                  |                                                                                                                            |               |               |               |     |
|----------------------------------|----------------------------------------------------------------------------------------------------------------------------|---------------|---------------|---------------|-----|
|                                  | $[(\text{Cu}^{\text{II}}\text{L}^{22})_2(\mu_{1,1}\text{-N}_3)_2\text{Cu}(\text{H}_2\text{O})] \cdot \text{CH}_3\text{OH}$ | 118.9         | Not performed | Not performed | 26l |
|                                  | $[(\text{Cu}^{\text{II}}\text{L}^{23})_2(\mu_{1,1}\text{-N}_3)_2\text{Cu}(\text{H}_2\text{O})] \cdot \text{CH}_3\text{OH}$ | 114.7         | Not performed | Not performed | 26l |
| <b>Ni<sup>II</sup> complexes</b> | $[\text{Ni}^{\text{II}}_2(\text{L}^{24})(\text{SCN})_2(\text{CH}_3\text{COO})-(\text{H}_2\text{O})]$                       | 863.9         | Not performed | Not performed | 27a |
|                                  | $[\text{Ni}^{\text{II}}_2(\text{L}^{25})(\text{SCN})_3(\text{CH}_3\text{OH})_2]$                                           | 161.1         | Not performed | Not performed | 27a |
|                                  | $[\text{Ni}^{\text{II}}_2(\text{L}^{24})(\text{SCN})_3(\text{H}_2\text{O})(\text{CH}_3\text{OH})]$                         | 154.0         | Not performed | Not performed | 27a |
|                                  | $[\text{Ni}^{\text{II}}_2(\text{L}^{25})(\text{SCN})(\text{CH}_3\text{COO})_2]$                                            | 303.7         | Not performed | Not performed | 27a |
|                                  | $[\text{Ni}^{\text{II}}_2(\text{L}^{24})(\text{N}_3)_3(\text{H}_2\text{O})_2]$                                             | 172.8         | Not performed | Not performed | 27a |
|                                  | $[\text{Ni}^{\text{II}}_2(\text{L}^{25})(\text{N}_3)_3(\text{H}_2\text{O})_2]$                                             | 264.1         | Not performed | Not performed | 27a |
|                                  | $[\text{Ni}^{\text{II}}_2\text{L}^{24}_2(\text{CH}_3\text{CN})_4](\text{ClO}_4)_2 \cdot 2\text{CH}_3\text{CN}$             | 7.9           | Not performed | Not performed | 27a |
|                                  | $[\text{Ni}^{\text{II}}_3(\text{L}^{25})_2(\text{NCS})_2(\text{H}_2\text{O})_4] \cdot \text{H}_2\text{O}$                  | 14.5          | Not performed | Not performed | 27a |
|                                  | $[\text{Ni}^{\text{II}}_2(\text{L}^{26})(\text{CH}_3\text{COO})_2(\text{N}(\text{CN})_2)]_n$                               | 128.6         | Not performed | Not performed | 27a |
|                                  | $[\text{Ni}^{\text{II}}_2(\text{L}^{27})(\text{CH}_3\text{COO})_2(\text{N}(\text{CN})_2)]$                                 | 275.0         | Not performed | Not performed | 27a |
|                                  | $[\text{Ni}^{\text{II}}_2\text{L}^{28}_2(\text{CH}_3\text{CN})_4](\text{ClO}_4)_2 \cdot 2\text{CH}_3\text{CN}$             | 7.9           | Not performed | Not performed | 6e  |
|                                  | $[\text{Ni}_3(\text{L}^{29})_2(\text{NCS})_2(\text{H}_2\text{O})_4] \cdot \text{H}_2\text{O}$                              | 14.5          | Not performed | Not performed | 6e  |
|                                  | $[\text{Ni}^{\text{II}}_2(\text{L}^{30})_2(\text{NCS})_2]$                                                                 | Not performed | 64.1          | Not performed | 27b |

|                                  |                                                                                                                                    |               |               |               |     |
|----------------------------------|------------------------------------------------------------------------------------------------------------------------------------|---------------|---------------|---------------|-----|
|                                  | $[\text{Ni}^{\text{II}}_2(\text{L}^{31})_2(\text{NCS})_2]$                                                                         | Not performed | 51.1          | Not performed | 27b |
|                                  | $[\text{Ni}^{\text{II}}_2(\text{L}^{32})_2(\text{NCS})_2]$                                                                         | Not performed | 81.7          | Not performed | 27b |
|                                  | $[\text{Ni}^{\text{II}}\text{L}^{33}(\text{H}_2\text{O})_3]_2 \cdot \text{H}_2\text{O}$                                            | 92.6          | Not performed | Not performed | 3d  |
|                                  | $[\text{Ni}^{\text{II}}\text{L}^{33}(\text{H}_2\text{O})_3]\text{Br}_2 \cdot \text{H}_2\text{O}$                                   | 84.8          | Not performed | Not performed | 3d  |
|                                  | $[\text{Ni}^{\text{II}}_2(\text{L}^{34})_2(\text{H}_2\text{O})_4](\text{NO}_3)_2$                                                  | 474           | Not performed | Not performed | 3d  |
|                                  | $[\text{Ni}^{\text{II}}_5(\text{L}^{35})_2(\text{CH}_3\text{COO})_6(\text{OH})_2] \cdot 5.5 \text{H}_2\text{O}$                    | 477           | Not performed | Not performed | 3d  |
|                                  | $[\text{Ni}^{\text{II}}\text{L}^{33}(\text{H}_2\text{O})_3](\text{NO}_3)_2$                                                        | 52.6          | Not performed | Not performed | 3d  |
|                                  | $[\text{Ni}^{\text{II}}\text{L}^{36}(\text{H}_2\text{O})_3](\text{NO}_3)_2$                                                        | 129           | Not performed | Not performed | 3d  |
|                                  | $[\text{Ni}^{\text{II}}_4(\text{L}^{37})_2(\text{H}_2\text{O})_8(\mu_2\text{H}_2\text{O})_2](\text{NO}_3)_6(\text{H}_2\text{O})_6$ | Not performed | Not performed | 12            | 27c |
|                                  | $[\text{Ni}^{\text{II}}_2\text{L}^{38}(\text{PhCOO})(\text{H}_2\text{O})_2]\text{ClO}_4$                                           | 167.4         | Not performed | Not performed | 27d |
| <b>Mn<sup>II</sup> complexes</b> | $[\text{Mn}^{\text{II}}(\text{HL}^{39})(\text{H}_2\text{O})_2(\text{CH}_3\text{CN})](\text{ClO}_4)_2$                              | Not performed | Not performed | 48.8          | 28a |
|                                  | $[\text{Mn}^{\text{II}}(\text{L}^{40})_2(\text{OH}_2)_2]$                                                                          | 598.0         | Not performed | Not performed | 28b |
|                                  | $[\text{Mn}^{\text{II}}(\text{HL}^{41})_2] \cdot 2\text{ClO}_4$                                                                    | 1038.0        | Not performed | Not performed | 28c |
|                                  | $[\text{Mn}^{\text{II}}(\text{HL}^{41})(\text{N}(\text{CN})_2)$                                                                    | 871.2         | Not performed | Not performed | 28c |
|                                  | $[\text{Mn}^{\text{II}}(\text{o}-(\text{NO}_2)\text{C}_6\text{H}_4\text{COO})_2(\text{L}^{42})(\text{H}_2\text{O})]_n$             | Not performed | 177.0         | Not performed | 28d |

|                                                  |                                                                                                                                                                |               |               |               |               |
|--------------------------------------------------|----------------------------------------------------------------------------------------------------------------------------------------------------------------|---------------|---------------|---------------|---------------|
|                                                  | $[\text{Mn}^{\text{II}}_4\text{L}^{43}(\mu_3\text{-Cl})_2\text{Cl}_2]$                                                                                         | 2265.5        | Not performed | Not performed | 28e           |
|                                                  | $[\text{Mn}^{\text{II}}_4\text{L}^{43}(\mu_{1,1,1}\text{-N}_3)_2(\text{N}_3)_2]$                                                                               | 2132.2        | Not performed | Not performed | 28e           |
| <b>Ni<sup>II</sup>-Mn<sup>II</sup> complexes</b> | $[(\text{Ni}^{\text{II}}\text{L}^{44})_2\text{Mn}^{\text{II}}(\text{NCS})_2]$                                                                                  | 104.5         | Not performed | Not performed | 7e            |
|                                                  | $[(\text{Ni}^{\text{II}}\text{L}^{44})_2\text{Mn}^{\text{II}}(\text{NCO})_2]$                                                                                  | 77.0          | Not performed | Not performed | 7e            |
|                                                  | $[\{\text{Ni}^{\text{II}}\text{L}^{44}(\text{EtOH})\}_2\text{Mn}^{\text{II}}(\text{NO}_2)_2] \cdot 2\text{EtOH}$                                               | 25.8          | Not performed | Not performed | 7e            |
|                                                  | $[(\text{Ni}^{\text{II}}\text{L}^{45})_2\text{Mn}^{\text{II}}\text{N}_3](\text{ClO}_4)$                                                                        | 768.0         | Not performed | Not performed | 7c            |
|                                                  | $[(\text{Ni}^{\text{II}}\text{L}^{45})_2\text{Mn}^{\text{II}}_2(\text{N}_3)_2(\mu_{1,1}\text{-N}_3)_2(\text{CH}_3\text{OH})_2]$                                | 1985.0        | Not performed | Not performed | 7c            |
|                                                  | $[\{(\text{Ni}^{\text{II}}\text{L}^{45})_2\text{Mn}^{\text{II}}\}_2(\mu_{1,3}\text{-N}_3)(\text{H}_2\text{O})] \cdot (\text{CH}_3\text{OH}), (\text{ClO}_4)_3$ | 2309.0        | Not performed | Not performed | 7c            |
|                                                  | $[(\text{Ni}^{\text{II}}\text{L}^{45})_2\text{Mn}^{\text{II}}_2(\text{N}_3)_2(\mu_{1,1}\text{-N}_3)_2(\text{CH}_3\text{OH})_2]$                                | 935.0         | Not performed | Not performed | 7d            |
|                                                  | $[(\text{Ni}^{\text{II}}\text{L}^{46})_2\text{Mn}^{\text{II}}_2(\text{N}_3)_2(\mu_{1,1}\text{-N}_3)_2(\text{CH}_3\text{OH})_2]$                                | 984.0         | Not performed | Not performed | 7g            |
|                                                  | $[(\text{Ni}^{\text{II}}\text{L}^{46})_2\text{Mn}^{\text{II}}_2(\text{N}_3)_2(\mu_{1,1}\text{-N}_3)_2(\text{CH}_3\text{OH})_2]$                                | 2081.0        | Not performed | Not performed | 7g            |
|                                                  | Complex 1                                                                                                                                                      | Not performed | 734.0         | Not performed | Present Study |
| <b>Cu<sup>II</sup>-Mn<sup>II</sup> complexes</b> | $[(\text{Cu}^{\text{II}}\text{L}^{47})\text{Mn}^{\text{II}}(\text{PhCOO})(\text{H}_2\text{O})]_2 \cdot (\text{CuL}^{42})_2(\text{ClO}_4)_2$                    | Not performed | 399.0         | Not performed | 10g           |
|                                                  | $[(\text{Cu}^{\text{II}}\text{L}^{48})_2\text{Mn}^{\text{II}}(\text{N}_3)(\text{H}_2\text{O})](\text{ClO}_4) \cdot \text{H}_2\text{O}$                         | 1118.0        | Not performed | Not performed | 7b            |
|                                                  | $[(\text{Cu}^{\text{II}}\text{L}^{49})_2\text{Mn}^{\text{II}}(\text{CH}_3\text{COO})_2]$                                                                       | Not performed | 139.0         | Not performed | 7f            |

|                                                                                                                                              |               |        |               |               |
|----------------------------------------------------------------------------------------------------------------------------------------------|---------------|--------|---------------|---------------|
| $[(\text{Cu}^{\text{II}}\text{L}^{49})_2\text{Mn}^{\text{II}}(\text{PhCOO})(\text{H}_2\text{O})]\text{Cl}$                                   | Not performed | 439.0  | Not performed | 7f            |
| $[(\text{Cu}^{\text{II}}\text{L}^{49})_2\text{Mn}^{\text{II}}((\text{p-OH})\text{PhCOO})(\text{H}_2\text{O})]\text{ClO}_4$                   | Not performed | 348.0  | Not performed | 7f            |
| $[(\text{Cu}^{\text{II}}\text{L}^{49})_2\text{Mn}^{\text{II}}(\text{HCOO})(\text{H}_2\text{O})]\text{ClO}_4$                                 | Not performed | 730.0  | Not performed | 7f            |
| $\{[(\text{Cu}^{\text{II}}\text{L}^{49})_2\text{Mn}^{\text{II}}(\text{nic})(\text{H}_2\text{O})_2](\text{ClO}_4)(0.5\text{H}_2\text{O})\}_n$ | Not performed | 1075.0 | Not performed | 3e            |
| $[(\text{Cu}^{\text{II}}\text{L}^{49})_2\text{Mn}^{\text{II}}(\text{nic})_2] \cdot 2\text{CH}_3\text{OH}$                                    | Not performed | 683.0  | Not performed | 3e            |
| $[(\text{Cu}^{\text{II}}\text{L}^{50})_2\text{Mn}^{\text{II}}_3(\text{PhCOO})_6]$                                                            | Not performed | 595.0  | Not performed | 12c           |
| $[(\text{Cu}^{\text{II}}\text{L}^{50})_2\text{Mn}^{\text{II}}(\text{CH}_3\text{COO})_2]$                                                     | Not performed | 39.9   | Not performed | 12c           |
| $\{[(\text{Cu}^{\text{II}}\text{L}^{50})_2\text{Mn}^{\text{II}}(\text{PhCH}_2\text{CO}_2)_2] \cdot 2\text{CH}_3\text{CN}\}$                  | Not performed | 204.5  | Not performed | 12c           |
| <b>Complex 2</b>                                                                                                                             | Not performed | 450.0  | Not performed | Present Study |
| <b>Complex 3</b>                                                                                                                             | Not performed | 358.0  | Not performed | Present Study |

<sup>a</sup>Where  $\text{HL}^1 = 2$ -dimethylamino-ethylamino)-methyl]-phenol,  $\text{HL}^2 = 2$ -[(2-diethylamino-ethylamino)-methyl]-phenol,  $\text{HL}^3 = 2$ -methoxy-6-(8-iminoquinolinylmethyl)phenol,  $\text{HL}^4 = 2$ -[(3-methylamino-propylimino)-methyl]phenol,  $\text{L}^5 = 2$ -aminoethylpyridine,  $\text{HL}^6 = 2$ -formyl-4-methyl-6-(4-(aminomethyl)-piperidine)-iminomethyl-phenol,  $\text{HL}^7 = 2,6$ -bis(2-amino-2-methyl-1-propanol)-iminomethyl-4-methyl-phenol,  $\text{HL}^9 = 2,6$ -bis(2-aminoethylpyridine)-iminomethyl-4-methyl-phenol,  $\text{HL}^8 = 2$ -formyl-4-methyl-6-(aminobenzyl)-iminomethyl-phenol,  $\text{H}_2\text{L}^9 =$  condensation product of 4-methyl-2,6-diformylphenol with 1,3-diaminopropane,  $\text{H}_2\text{L}^{10} =$  condensation product of 4-methyl-2,6-diformylphenol with 1,2-diaminoethane,  $\text{H}_2\text{L}^{11} =$  condensation product of 4-methyl-2,6-diformylphenol with 1,2-diaminopropane,  $\text{H}_2\text{L}^{12} =$  condensation product of 4-methyl-2,6-diformylphenol with 1,2-diamino-2-methylpropane,  $\text{H}_2\text{L}^{13} =$  condensation product of 4-methyl-2,6-diformylphenol with 1,2-diaminocyclohexane,  $\text{H}_3\text{L}^{14} = 2,6$ -bis[ {(2-hydroxybenzyl)(N-(2-pyridylmethyl)amino) methyl]-4-methylphenol,  $\text{L}^{15} = \text{N,N}'$ -



(ethane-1,2-diyl-di-o-phenylene)-bis(pyridine-2-carboxamide),  $L^{16} = 2,8$ -dimethyl-5,11-bis(pyridin-2-ethyl)-1,4,5,6,7,10,11,12-octahydroimidazo [4,5-h]imidazo[4,5c][1,6]-diazecine,  $H_2L^{17} = N,N'$ -bis{(2-hydroxy-3-formyl-5-methylbenzyl)(dimethyl)}-ethylenediamine,  $L^{18} = 3$ -methoxy-2-oxo-benzaldehyde,  $H_2L^{19} = N,N'$ -bis(2-hydroxy-3,5-di-tertiarybutylbenzyl)homopiperazine,  $H_2L^{20} = 2$ -[(2-hydroxy ethylimino)-propylimino)-methyl]-6-methoxy-phenol,  $H_2L^{21} = N,N$ -bis(3,5-dimethyl-2-hydroxybenzyl)- $N',N'$ -dimethyl-1,3-diaminopropane,  $H_2L^{22} = N,N$ -bis(3,5-dimethyl-2-hydroxybenzyl)- $N',N'$ -dimethyl-1,2-diaminoethane,  $H_2L^{23} = N,N$ -bis(3,5-dimethyl-2-hydroxybenzyl)- $N',N'$ -diethyl-1,2-diaminoethane,  $HL^{24} = 2,6$ -bis( $R_2$ -iminomethyl)-4- $R_1$ -phenol;  $R_1 =$  tert-butyl,  $R_2 = N,N$ -dimethylethylene,  $HL^{25} = 2,6$ -bis( $R_2$ -iminomethyl)-4- $R_1$ -phenol;  $R_1 =$  tert-butyl,  $R_2 = 2$ -( $N$ -ethyl)pyridine,  $HL^{26} = 2,6$ -bis( $R_2$ -iminomethyl)-4- $R_1$ -phenol;  $R_1 =$  methyl,  $R_2 = N,N$ -dimethylethylene,  $HL^{27} = 2,6$ -bis( $R_2$ -iminomethyl)-4- $R_1$ -phenol;  $R_1 =$  methyl,  $R_2 = 2$ -( $N$ -ethyl)pyridine,  $deen = 2$ -(diethylamino) ethylamine,  $dmpn = 3$ -(dimethylamino)-1-propylamine, and  $modaH =$  diacetyl monoxime,  $HL^{28} = 2$ -[1-(3-methylamino-propylamino)-ethyl]-phenol,  $HL^{29} = 2$ -[1-(2-dimethylamino-ethylamino)-ethyl]-phenol,  $HL^{30} = 2$ -[1-(3-dimethylamino-propylamino)-ethyl]-phenol,  $HL^{31} = 2$ -[(2-piperazin-1-ylethylimino)methyl]phenol,  $HL^{32} = 2$ -formyl-4-methyl-6-(1-(2-aminomethyl)piperidine)-iminomethylphenol,  $HL^{33} = 4$ -methyl-2,6-bis(1-(2-aminomethyl)piperidine)-iminomethylphenol,  $HL^{34} = 2$ -[(2-piperazin-1-ylethylimino)methyl]-4-chlorophenol,  $HL^{35} = 2,6$  diformyl-4-isopropyl phenol,  $HL^{36} = 2$ -[(3-methylamino-propylamino)-methyl]-4-nitrophenol,  $HL^{37} = 2$ -[(3-methylamino-propylamino)-methyl]-4-phenol,  $L^{39} = 1,3$ -Bis(6'-methyl-2-pyridylimino)isoindoline,  $L^{40} = 3$ -methoxy-4-hydroxy-benzaldehyde,  $HL^{41} = 4$ -tert-butyl-2,6-bis-[(2-pyridin-2-yl-ethylimino)-methyl]-phenol,  $L^{42} =$  Pyrazine,  $H_2L^{43} = N,N'$ -dimethyl- $N,N'$ -bis(2-hydroxy-3-methoxy-5-methylbenzyl)ethylenediamine,  $H_2L^{44} = N,N'$ -bis(salicylidene)-1,3-propanediamine,  $H_2L^{45} = N$ - $\alpha$ -methylsalicylidene- $N'$ -3-methoxysalicylidene-1,3-propanediamine,  $H_2L^{46} = N$ - $\alpha$ -methylsalicylidene- $N'$ -salicylidene-1,3-propanediamine,  $H_2L^{47} = N$ -salicylidene- $N'$ -3-methoxysalicylidene-1,2-ethylenediamine,  $H_2L^{48} = N$ -(2-Hydroxyacetophenylidene)- $N'$ -salicylidene-1,3-propanediamine,  $H_2L^{49} = N,N'$ -bis( $\alpha$ -methylsalicylidene)-1,3-propanediamine,  $H_2L^{50} = N,N'$ -bis(2-hydroxynaphthyl-methylidene)-1,3-propanediamine.
